# Supplementary material for: Novel iron oxide–cerium oxide core–shell nanoparticles as a potential theranostic material for ROS related inflammatory diseases
Source: Royal Society of Chemistry journal article supplement (doi:10.1039/c8tb00022k), 2018-01-01
Supplement: c8tb00022k1.pdf [file c8tb00022k1.pdf]

**Supporting Information for**

**Novel iron oxide-cerium oxide core-shell nanoparticle as a potential  
theranostic material for ROS related inflammatory diseases**

Yuo Wu<sup>a</sup>, Yanchen Yang<sup>a</sup>, Wei Zhao<sup>a</sup>, Zhi Ping Xu<sup>a</sup>, Peter Little<sup>d</sup>, Andrew K. Whittaker<sup>a,b,c</sup>,  
Run Zhang<sup>a</sup>, Hang T. Ta<sup>a,b,d\*</sup>

<sup>a</sup>Australian Institute for Bioengineering and Nanotechnology, The University of Queensland,  
Brisbane, Australia

<sup>b</sup>Australian Research Council Centre of Excellence in Convergent Bio-Nano Science and  
Technology, Brisbane, Australia

<sup>c</sup>Centre for Advanced Imaging, the University of Queensland, Brisbane, Australia

<sup>d</sup>School of Pharmacy, the University of Queensland, Brisbane, Australia

\*Correspondence to Hang T. Ta ([h.ta@uq.edu.au](mailto:h.ta@uq.edu.au))

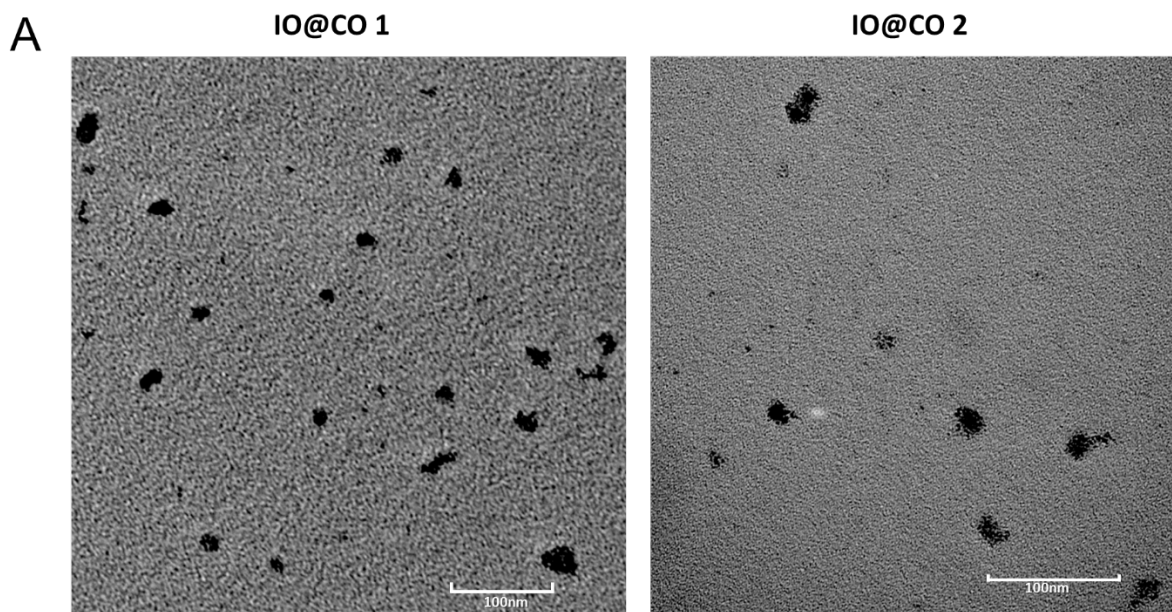

**Figure S1.** Low magnification TEM images IO@CO1 and IO@CO2 nanoparticles. Low magnification images showed the both distribution of IO@CO1 and IO@CO2 are good which corresponding to DLS data.

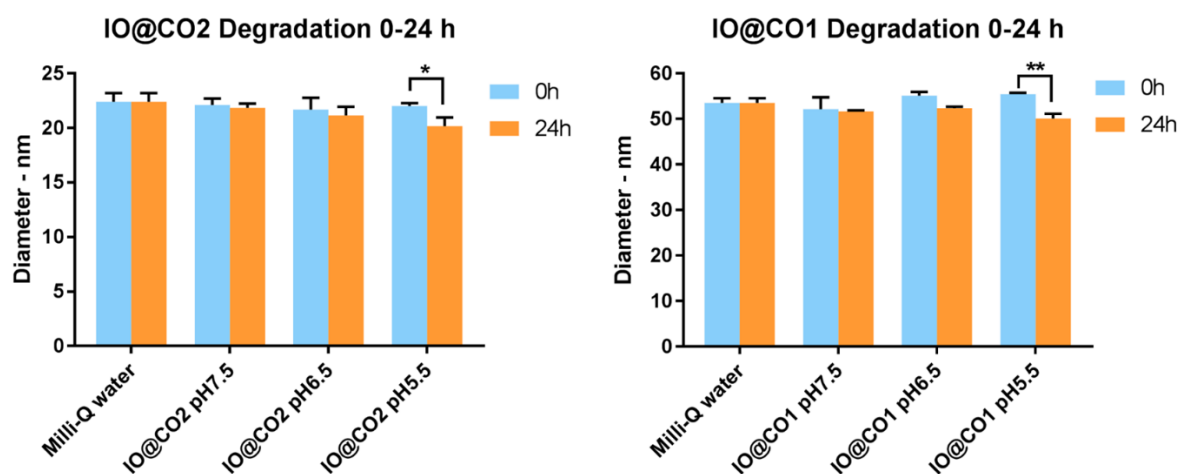

**Figure S2.** Degradation studies of IO@CO1 and IO@CO2. The Degradation studies showed both size of the IO@CO1 and IO@CO2 were decreased after 24hours treated by pH12 water.
